# Supplementary material for: Radiomics in the evaluation of ovarian masses — a systematic review
Source: Insights Imaging. 2023 Oct 2;14:165. doi: 10.1186/s13244-023-01500-y (PMC10545652; doi:10.1186/s13244-023-01500-y)
Supplement: Supplementary file 3 — Additional file 3: Supplementary Table S2. Radiomics Quality Score (RQS) criteria [file 13244_2023_1500_MOESM3_ESM.xlsx]

## Sheet: Supplemental Table 2 RQS
	Criteria	Score	Scoring Description
1	Image protocol quality – well-documented image protocols (e.g., contrast, slice thickness, energy, etc.) and/or usage of public image protocols allow reproducibility/replicability.	0 +1 +2	+1 (if protocols are well-documented) +1 (if public protocol is used)
2	Multiple segmentations – possible actions are: segmentation by different physicians/algorithms/software, perturbing segmentations by (random) noise, segmentation at different breathing cycles. Analyze feature robustness to segmentation variabilities	0 +1	+1
3	Phantom study on all scanners – detect inter-scanner differences and vendor-dependent features. Analyze feature robustness to these sources of variability	0 +1	+1
4	Imaging at multiple time points – collect individuals’ images at additional time points. Analyze feature robustness to temporal variabilities (e.g., organ movement, organ expansion/shrinkage).	0 +1	+1
5	Feature reduction or adjustment for multiple testing – decreases the risk of overfitting. Overfitting is inevitable if the number of features exceeds the number of samples. Consider feature robustness when selecting features	+3 -3	−3 (if neither measure is implemented) +3 (if either measure is implemented)
6	Multivariable analysis with non radiomic features (e.g., EGFR mutation) – is expected to provide a more holistic model. Permits correlating/inferencing between radiomics and non radiomics features	0 +1 +2
7	Detect and discuss biological correlates – demonstration of phenotypic differences (possibly associated with underlying gene–protein expression patterns) deepens understanding of radiomics and biology	0 +1
8	Cut-off analyses – determine risk groups by either the median, a previously published cut-off or report a continuous risk variable. Reduces the risk of reporting overly optimistic results	0 +1
9	Discrimination statistics – report discrimination statistics (e.g., C-statistic, ROC curve, AUC) and their statistical significance (e.g., p-values, confidence intervals). One can also apply resampling method (e.g., bootstrapping, cross-validation)	0 +1 +2	+1 (if a discrimination statistic and its statistical significance are reported) +1 (if also an resampling method technique is applied)
10	Calibration statistics – report calibration statistics (e.g., Calibration-in-the-large/slope, calibration plots) and their statistical significance (e.g., p-values, confidence intervals). One can also apply resampling method (e.g., bootstrapping, cross-validation)	0 +1 +2	+1 (if a calibration statistic and its statistical significance are reported) +1 (if also a resampling method technique is applied)
11	Prospective study registered in a trial database – provides the highest level of evidence supporting the clinical validity and usefulness of the radiomics biomarker	0 +7	+7 (for prospective validation of a radiomics signature in an appropriate trial)
12	Validation – the validation is performed without retraining and without adaptation of the cut-off value, provides crucial information with regard to credible clinical performance	-5 +2 +3 +4 +5	−5 (if validation is missing) +2 (if validation is based on a dataset from the same institute) +3 (if validation is based on a dataset from another institute) +4 (if validation is based on two datasets from two distinct institutes) +4 (if the study validates a previously published signature) +5 (if validation is based on three or more datasets from distinct institutes) *Datasets should be of comp…
13	Comparison to ‘gold standard’ – assess the extent to which the model agrees with/is superior to the current ‘gold standard’ method (e.g., TNM-staging for survival prediction). This comparison shows the added value of radiomics	0 +2
14	Potential clinical utility – report on the current and potential application of the model in a clinical setting (e.g., decision curve analysis)	0 +2
15	Cost-effectiveness analysis – report on the cost-effectiveness of the clinical application (e.g., quality adjusted life years generated)	0 +1
16	Open science and data – make code and data publicly available. Open science facilitates knowledge transfer and reproducibility of the study	0 +1 +3 +4	+1 (if scans are open source) +1 (if region of interest segmentations are open source) +1 (if code is open source) +1 (if radiomics features are calculated on a set of representative ROIs and the calculated features + representative ROIs are open source)
