# Supplementary material for: Radiomics in the evaluation of ovarian masses — a systematic review
Source: Insights Imaging. 2023 Oct 2;14:165. doi: 10.1186/s13244-023-01500-y (PMC10545652; doi:10.1186/s13244-023-01500-y)
Supplement: Supplementary file 6 — Additional file 6: Supplementary Table S5. Radiomic feature categories. GLCM, Gray-level co-occurrence matrix; GLRLM, Gray-level run length matrix; GLSZM, Gray-level size zone matrix; GLDM, Gray-level dependence matrix; NGTDM, Neighbourhood gray-tone difference matrix; GLDM, Gray-level dependence matrix; LBP, Local binary patterns; ROI, Region of interest. [file 13244_2023_1500_MOESM6_ESM.xlsx]

## Sheet: Supplemental Table 5
Category			Examples	Explanation
Shape features	Basic shape features	Shape-based statistics	Surface area, volume, sphericity, compactness, surface volume ratio, maximum 3D diameter, maximum 2D diameter, maximum 2D diameter slice, elongation, flatness, roundness, equivalent spherical radius, axis lengths, principal moments, principal axes, principal moments angle, major axis length, minor axis length, least axis length	Features that describe the shape and size of the ROI. These features can provide information about the morphology of the lesion.
		Shape and margin	Surface roughness, surface area to volume ratio, compactness 1, compactness 2	Features that describe both the shape and margin of the lesion or ROI. Can provide information about the surface irregularities and complexity of the lesion, as well as the degree of infiltration into surrounding tissue.
	Combined shape features	Shape and intensity	Mean distance to the centroid, intensity distribution	Features that combine information from the shape and gray level categories to provide a more comprehensive analysis of the lesion or ROI. Can provide information about the distribution of pixel intensities relative to the shape of the lesion.
		Shape and texture combinations	Shape and texture index, shape and texture correlation, shape and texture joint entropy	Features that combine information from the shape and texture categories to provide a more comprehensive analysis of the lesion or ROI.
Texture features	Basic texture features	Texture	Entropy, homogeneity, contrast, energy, correlation, angular second moment, GLCM features, GLRLM features, GLSZM features, NGLDM features, fractal features	Features that describe the spatial arrangement of pixel intensities within the ROI. Can provide information about the texture, heterogeneity or homogeneity of the lesion.
		Edge	Gradient, Laplacian of Gaussian (LoG), wavelet-based features, Sobel, Canny, Gabor	Features that describe the strength and sharpness of edges within the ROI. Can provide information about the texture and structure of the lesion and differentiate between different types of edges, such as smooth vs. rough or sharp vs. blurred.
		Fractal	Fractal dimension, lacunarity	Features that describe the complexity and irregularity of the lesion or ROI using fractal analysis. Can provide information about the degree of heterogeneity and structural complexity of the lesion.
	Matrix-based texture features	GLCM	Angular second moment, contrast, correlation, variance, inverse difference moment, sum average, sum variance, sum entropy, entropy, difference variance, difference entropy, information measure of correlation, information measure of correlation 1, information measure of correlation 2	Features that describe the co-occurrence of pairs of voxel intensity values within the ROI. These features can provide information about the texture and structure of the lesion.
		GLRLM	Short run emphasis, long run emphasis, gray level non-uniformity, run length non-uniformity, run percentage, low gray level run emphasis, high gray level run emphasis, short run low gray level emphasis, short run high gray level emphasis, long run low gray level emphasis, long run high gray level emphasis	Features that describe the distribution of homogeneous runs of pixels within the ROI. These features can provide information about the texture and structure of the lesion, such as short vs. long or sparse vs. dense.
		GLSZM	Small area emphasis, large area emphasis, gray level non-uniformity, size zone non-uniformity, gray zone non-uniformity, zone percentage	Features that describe the distribution of homogenous zones of a given size in the lesion or ROI. These features can provide information about the texture, heterogeneity or homogeneity of the lesion.
		GLDM	Grey level dependence matrix features measure the spatial dependence of a gray level value to all other gray level values in the ROI.	These features can provide information about the texture and structure of the lesion, such as clustered vs. dispersed or dominant vs. non-dominant.
		NGTDM	Coarseness, contrast, busyness, complexity, strength	Features that describe the difference between the gray values of each voxel and its surrounding voxels within the ROI. These features can provide information about the texture and homogeneity of the lesion.
		GLDM	GLDM entropy, GLDM homogeneity, GLDM contrast, GLDM energy, GLDM busyness, GLDM complexity, GLDM strength	Features that describe the spatial dependence of a gray level value to all other gray level values in the ROI. GLDM features are used to characterize the homogeneity and texture of the lesion or ROI based on the distribution of gray level values and their spatial relationships. These features can provide information about the texture and structure of the lesion, such as clustered vs. dispersed or…
	Advanced texture features	Wavelet	Wavelet variance, wavelet entropy, wavelet-based texture features	Features that describe the distribution of pixel intensity values across different scales and orientations using wavelet analysis. Can provide information about the texture and structure of the lesion, such as fine vs. coarse or isotropic vs. anisotropic.
		LBP	LBP features for different radii and neighbors, LBP histogram	Capture the spatial relationship between pixel intensities within the ROI by encoding the local structure of an image. Offer insights into the micro-texture and patterns within the lesion.
		Haralick features	Haralick texture features derived from GLCM (mean, variance, range)	Represent the relationship between pixel intensities in the ROI using GLCM. Offer insights into the texture and structure of the lesion.
		Gabor filters	Gabor filter response features with varying frequencies and orientations	Extract frequency and orientation information in the ROI using Gabor filters. Provide insights into the texture, structure, and directionality of the lesion.
Intensity features		First order statistics	Mean, variance, skewness, kurtosis, median, minimum, maximum, range, interquartile range, energy, root mean squared, entropy, robust mean absolute deviation, absolute mean deviation, coefficient of variation	Features that describe the basic statistical properties of the voxel intensity distribution within the ROI. These features can provide information about the average intensity, variability, and distribution of pixel intensities.
		Histogram-based features	Histogram percentiles (10th, 25th, 50th, 75th, 90th), histogram kurtosis, histogram skewness	Describe the pixel intensity distribution within the ROI using histogram analysis. Provide insights into the spread, central tendency, and asymmetry of pixel intensities.
Frequency domain features		Fourier-based features	Power spectrum, radial and angular frequencies	Analyze the frequency content of the ROI using Fourier analysis. Offer insights into periodic patterns and spatial frequencies within the lesion.
Geometric features		Hough transform features	Circular Hough Transform, Line Hough Transform	Detect the presence and characteristics of geometric shapes (e.g., circles, lines) within the ROI using Hough Transform. Provide insights into the structure and organization of the lesion.
Region-based features		Region-based features	Eccentricity, solidity, convexity, perimeter, bounding box dimensions, Hu moments	Describe the spatial properties and relationships of the ROI. Offer insights into the shape, orientation, and compactness of the lesion.
