# Supplementary material for: Radiomics in the evaluation of ovarian masses — a systematic review
Source: Insights Imaging. 2023 Oct 2;14:165. doi: 10.1186/s13244-023-01500-y (PMC10545652; doi:10.1186/s13244-023-01500-y)
Supplement: Supplementary file 7 — Additional file 7: Supplementary Table S6. Radiomic model details for studies. 3D, Three-Dimensional; ADC, Apparent Diffusion Coefficient; CA-125, Cancer Antigen 125; CA-153, Cancer Antigen 153; CA-199, Cancer Antigen 199; CE-T1WI, Contrast-Enhanced T1-Weighted Imaging; CEA, Carcinoembryonic Antigen; CER, Contrast enhancement ratio; Coif, Coiflets Wavelet Kernel; CP, Cluster Prominence; CT (radiomic feature), Cluster Tendency; CT (modality), Computed Tomography; DCE-MRI, Dynamic Contrast-Enhanced Magnetic Resonance Imaging; DCT, Discrete Cosine Transform; DE, Dependence Entropy; DV, Dependence Variance; DWI, Diffusion-Weighted Imaging; DWI FS, Diffusion-Weighted Imaging with Fat Suppression; F1, Feature 1; F2, Feature 2; F4, Feature 4; FIGO, International Federation of Gynecology and Obstetrics; FIRSTORDER, First Order (refers to a set of basic statistics features in radiomics); FOS, First Order Statistics; fPV, Fractional plasma volume; FS, Fat Suppression; FS-T2WI, Fat Suppressed T2-Weighted Imaging; GLCM, Gray Level Co-occurrence Matrix; GLCM-E, GLCM Energy; GLDM, Gray Level Dependence Matrix; GLN, Grey Level Nonuniformity; GLRLM, Gray Level Run Length Matrix; GLSZM, Gray Level Size Zone Matrix; GLVariance, Gray Level Variance; GLZLM, Gray Level Zone Length Matrix; HC, Haralick Correlation; HDLC, High Density Lipoprotein; HH, High-High; HHH, High-High-High; HHL, High-High-Low; HILAE, High intensity Large Area Emphasis; HISTO, Histogram; HL, High-Low; HLL, High-Low-Low; IAUGC, Initial area under the gadolinium concentration curve; IDM, Inverse Difference Moment; IDMN, Inverse Difference Moment Normalized; IDN, Inverse Difference Normalized; Imc1, Inverse Difference Moment Normalized; IMC2, Information Measure of Correlation 2; IQR, Interquartile Range; ISM, Inter-site Similarity Matrix; IV, Intensity Variability; K, Kurtosis; Kep, Rate constant; Ktrans, Volume transfer constant; LAHGLE, Large Area High Gray Level Emphasis; LALGLE, Large Area Low Gray Level Emphasi [file 13244_2023_1500_MOESM7_ESM.xlsx]

## Sheet: Supplemental Table 6
Author	Radiomic software	No of features extracted	Features names	No of features included in final model	Features included in final model	Mentioned significant radiomic features	No of non radiomic features tested	Non radiomic features tested	No of non radiomic features	Included non radiomic features	Results
Song et al (30)	PyRadiomics	960	Shape Features (14 features) First-Order Statistical Features (18 features) Gray-Level Cooccurrence Matrix (GLCM) Features (22 features) Gray-Level Run Length Matrix (GLRLM) Features (16 features) Gray-Level Size Zone Matrix (GLSZM) Features (16 features) Gray-Level Dependence Matrix (GLDM) Features (14 features) Image filters used: Laplacian of Gaussian (2D), Wavelet filter (3D)	Refer to right cell.	Ktrans: 935 Kep: 753 Ve: 959 fPV: 861 IAUGC: 955 CER: 948 PostC: 945	N/A	N/A	N/A	N/A	N/A	AUCs of 0.899, 0.865, and 0.893 for tasks A, B, and C, respectively. The 3-class classification task demonstrated a AUCs of 0.893, 0.944, and 0.891 for the benign, borderline, and malignant groups, respectively. Radiomic analysis using the pharmacokinetic model demonstrated an overall accuracy of 0.740.
Chiappa et al (36)	TRACE4	319		269- solid 278 - cystic 306 - motley	N/A	N/A	N/A	N/A	N/A	N/A	AUCs of 0.87, 0.88 and 0.89 and accuracies of 0.8, 0.87, 0.81 for the solid, cystic, and motley classifications respectively.
Chiappa et al (37)	TRACE4	319		269- solid 278 - cystic 306 - motley	N/A	N/A	2	Acoustic shadow, serum CA-125	2	Acoustic shadow, serum CA-125	Mean accuracy of 0.88 for the validation set and 0.91 for the test set.
Li et al (24)	AK software (Artificial Intelligence Kit, GE Healthcare)	396	Texture, Histograms, Form factors, Gray-level co-occurrence matrices (GLCM), Grey level run-length matrix (RLM), Gray-level zone-size matrices (GLZSM)	14	IDM (All Direction offset SD), LRE (All Direction offset 4 SD), CP (All Direction offset 7 SD), IV, SRE (All Direction offset 7 SD), MI, HC (All Direction offset 7), K, GLCM-E (All Direction offset 1 SD), GLN (All Direction offset 4 SD), MD, LRLGLE (All Direction offset 4 SD), LGLRE (All Direction offset 7 SD), HILAE	N/A	N/A	N/A	4	Age, ascites, boundary, CA-125	The radiomics nomogram demonstrated AUCs of 0.95 and 0.96 for the training and test samples respectively.
Li et al (25)	PyRadiomics	851	Shape Features (14 features) First-Order Features (18 features) Gray-Level Co-occurrence Matrix (GLCM) Features (24 features) Gray-Level Size Zone Matrix (GLSZM) Features (16 features) Gray-Level Run Length Matrix (GLRLM) Features (16 features) Neighboring Gray Tone Difference Matrix (NGTDM) Features (5 features) Gray-Level Dependence Matrix (GLDM) Features (14 features) Wavelet Features (744 fea…		WT signatures: T2WI FS: wavelet.HHL_Max, wavelet.HHL_DV, wavelet.HHH_ZV DWI: wavelet.LHL_CT, wavelet.HHL_Skewness ADC: wavelet.LHL_LDHGLE, wavelet.LHH_Kurtosis, wavelet.HHL_LALGLE CE-T1WI: wavelet.LLL_SRHGLE Multi-parameters: T2WI FS Signature, DWI Signature, ADC Signature, CE-T1W1 Signature ST signatures: T2WI FS: wavelet.LLL_DV DWI: original_IQR, wavelet.HLL_DE ADC: wavelet.LHL_DE, wavelet.LLL_…	N/A	1	Age	1	Age	Multiparametric whole tumour model demonstrated an AUC of 0.932 and 0.902 in the internal and external validation sets respectively. Radiologist performance was poorer than the ML model with an AUC of 0.792 and 0.797 in the internal and external validation sets respectively.
Lupean et al (31)	Texlab	24	6 Parameters computed for 4 Spatial Scale of the Filter (SSF) values, totaling 24 texture parameters: Mean Standard Deviation (SD) Mean of Positive Pixels (MPP) Entropy Skewness Kurtosis	24	6 Parameters computed for 4 SSF values, totaling 24 texture parameters: Mean, SD, MPP, Entropy, Skewness, Kurtosis	SD (SSF = 4)	N/A	N/A	N/A	N/A	Standard deviation of pixel intensity was an independent predictor of malignant cysts (AUC = 0.738; sensitivity, 61.54%; specificity, 86.67%). The prediction model was able to identify malignant lesions with 84.62% sensitivity and 80% specificity (AUC = 0.841).
Park et al (26)	Texrad	8	Total pixel Mean, Standard Deviation (SD), Entropy Mean Value of Positive Pixels (MPP) Skewness Kurtosis Entropy		Total pixel, SD, mean, entropy, skewness	Total pixel	1	Age	1	Age	Three different modelling techniques demonstrated AUCs of 0.88, 0.88, and 0.87 for RF, SVM, and LR respectively. Sensitivity and specificity were 92%, 60% for RF, 91% and 69% for SVM and 92%, 61% for LR.
Wang et al (32)	“radiomics-develop” package from the Naqa lab in McGill University	173	Morphology-based, Intensity-based (79 features) Texture-based (94 features)	10, 20, 50, 100	N/A	N/A	5	Age, tumour volume, CA-125, menopause status, characteristics of the lesion (mixed, solid, cystic)	5	Age, tumour volume, CA-125, menopause status, characteristics of the lesion	Test accuracy of 0.87 was achieved by the EfficientNet ensemble model with an AUC of 0.81. Junior radiologists achieved an accuracy of 0.64 and senior radiologists achieved an accuracy of 0.74. Aided by the deep learning model, junior radiologist achieved an accuracy of 0.77.
Aramendía-Vidaurreta et al (38)	Matlab	80	Local Binary Pattern (LBP) Fractal Dimension (FD) Entropy (Shannon entropy and Kapur's entropy) Hu's Invariant Moments Gray-level Co-occurrence Matrix (GLCM) Laws' Texture Energy (LTE) Gabor Wavelet Transform (GWT)	40	N/A	N/A	1	Age	1	Age	Accuracy - 98.78%, sensitivity - 98.50%, specificity - 98.90%, AUC - 0.997.
Zhang et al (33)	Not stated	1714			N/A	The most important radiomics features were LHH, SRHGE from coronal T2WI for identifying benign and malignant tumors, LLH variance from coronal T2WI images for classifying type I and type II and eccentricity from axial T1WI images for determining Ki-67 expression 50% threshold classification. The best five selected features extracted from MRI radiomics for survival analysis: T1WI (Wavelet LHL) Tex…	N/A	N/A	N/A	N/A	The SVM model demonstrated an accuracy of 90.3% and an AUC of 0.975 in differentiating between benign ovarian lesions and an accuracy of 92.7% and an AUC of 0.859 in classifying these tumours into type I and type II. The LASSO model was able to stratify patients into high and low risk groups with an AUC of 0.899. Radiologists demonstrated 83.5% accuracy.
Yu et al (27)	3D slicer	1167	Shape-Based Features (14 features) First-Order Features (216 features) Gray-Level Cooccurrence Matrix (GLCM) Features (289 features) Gray-Level Run-Length Matrix (GLRLM) Features (192 features) Gray-Level Size Zone Matrix (GLSZM) Features (192 features) Neighboring Gray Tone Difference Matrix (NGTDM) Features (60 features) Gray-Level Dependence Matrix (GLDM) Features (204 features)	9	N/A	Arterial Phase GLDM LargeDependenceEmphasis, GLSZM ZoneEntropy, GLRLM RunLengthNonUniformity Normalized, GLSZM GrayLevelNonUniformityNormalized, GLCM IMC2, GLCM MCC, GLRLM LowGrayLevelRunEmphasis, GLCM MaximumProbability Venous Phase GLCM IDN, GLRLM RunLengthNonUniformityNormalized, GLCM IMC2, GLCM ClusterShade, GLCM InverseVariance, NGTDM Contrast, GLSZM LowGrayLevelZoneEmphasis, FIRSTORDER Medi…	N/A	N/A	N/A	N/A	AUCs of 0.8, 0.86, and 0.73 and accuracies of 0.75 for the AP, VP, and EP models respectively.
Qian et al (34)	PyRadiomics	1070	Shape-based Features First-order Statistical Features Gray-level Cooccurrence Matrix (GLCM) Features Extracted from: Original Images Filtered Images (3 Laplace of Gaussian filter) Filtered Images (8 Wavelet Transform) Gray-level Size Zone Matrix (GLSZM) Features Extracted from: Original Images Filtered Images (3 Laplace of Gaussian filter) Filtered Images (8 Wavelet Transform) Gray-level Run-leng…	T2WI, DWI, and DCE-MRI sequences retained 867, 802, and 845 radiomic features respectively	FS-T2WI FS-T2WI GLCM_Imc1 FS-T2WI GLCM_JointEnergy FS-T2WI GLSZM_SZNonUniformityNormalized FS-T2WI GLSZM_ZoneEntropy DCE-MRI DCE-MRI 3D_GLSZM_LGLE DCE-MRI firstorder_Maximum DCE-MRI GLSZM_ZoneEntropy DCE-MRI GLCM_SumEntropy DCE-MRI GLSZM_ZoneEntropy DCE-MRI GLSZM_LGLE DWI DWI GLCM_MCC DWI 3D_GLSZM_SZNonUniformityNormalized DWI GLSZM_SAE DWI GLSZM_LGLE Combined DCE-MRI GLSZM_LGLE DWI GLCM_MCC DWI …	N/A	3	Age, preoperative CA125 level, and patient symptoms, including asymptomatic and symptomatic symptoms (constipation, abdominal discomfort or pain, bloating).	2	Age, CA-125	Traditional models demonstrated AUC of 0.96, and an accuracy of 0.91. The performance of the mixed model was not statistically significantly different with an AUC of 0.91 and accuracy of 0.93.
Zhu et al (28)	LIFEx	148	23 first-order features derived from: Histogram Shape Conventional Statistics 125 second-order features derived from: Gray-level Co-occurrence Matrix (GLCM) Neighborhood Gray-level Difference Matrix (NGLDM) Gray-level Run Length Matrix (GLRLM) Gray-level Zone Length Matrix (GLZLM)	8	HISTO _ Skewness SHAPE _Volume SHAPE _ Sphericity GLCM _Homogeneity_1 GLRLM _RP_1 GLRLM _ RP _ 2 GLRLM _ RP _ 3 GLRLM _ RP _ 4	N/A	8	Age, total cholesterol, triglyceride, high density lipoprotein, low density lipoprotein, blood sugar, CA-125, CEA	2	Age, CA-125	The sensitivity and specificity for radiomics signature, clinical model, and combined model were 0.94, 0.47; 0.72, 0.87; and 0.98, 0.67, respectively. The AUCs of the radiomics signature, clinical model, and combined model were 0.781, 0.806, and 0.869 respectively.
Hu et al (29)	AK software (Artificial Intelligence Kit, GE Healthcare)	396	Histogram Formfactor Grey-level size zone matrix(GLSZM) Run-length matrix (RLM)	2	Percentile15 Inverse Difference Moment_AllDirection_offset1_SD	N/A	N/A	N/A	2	CEA, CA-125	Sensitivity was 78.8% and specificity was 90.7%. This study demonstrated promising results and evaluation.
Jian et al (35)	Not stated	851	Shape-based features (14 features) First-order Statistics (FOS) features (18 features) Gray-level Co-occurrence Matrix (GLCM) features (24 features) Gray-level Run Length Matrix (GLRLM) features (16 features) Gray-level Size Zone Matrix (GLSZM) features (16 features) Neighboring Gray-tone Difference Matrix (NGTDM) features (5 features) Gray-level Dependence Matrix (GLDM) features (14 features) Wa…	4	T2WI FS Intercept original_glrlm_SRHGLE wavelet.HLL_GLCM_MCC wavelet.HHH_GLSZM_SZNonUniformity wavelet.LLL_gldm_DV DWI FS Intercept shape_Sphericity wavelet.LLH_glrlm_RLNonUniformity wavelet.LHL_GLSZM_GLVariance wavelet.HHH_GLSZM_SALGLE ADC Intercept shape_Sphericity wavelet.LLH_glrlm_RLNonUniformity wavelet.HLL_firstorder_Skewness wavelet.HHH_firstorder_Median CE-T1WI Intercept shape_Sphericity …	N/A	N/A	N/A	N/A	N/A	AUCs of T2WI FS, DWI, ADC map, CE-T1WI, and combined model in the training cohort were 0.849, 0.860, 0.826, 0.851, and 0.899 respectively. In the internal validation cohort, the T2WI FS, DWI, ADC, CE-T1WI, and combined models showed AUCs of 0.796, 0.726, 0.721, 0.773, and 0.806. In the external validation cohort, the T2WI FS, DWI, ADC, CE-T1WI, and combined models showed AUCs of 0.653, 0.842, 0.7…
Lu et al (39)	Texlab	657	Shape and Size features First-order statistics Second-order statistics Wavelet features		N/A	N/A	N/A	N/A	N/A	N/A	Patient groups stratified by RPV had distinct OS differences in the training dataset (N = 136, p < 0.0001). OS differences were confirmed in two independent validation sets: internal validation dataset-(N = 77, p = 0.0274), external dataset - (N = 70, p = 0.000105). RPV was found to improve clinical prognostic methods (stage, age, postoperative residual disease) as measured by the concordance ind…
Yao et al (45)	AK software (Artificial Intelligence Kit, GE Healthcare)	387	1) histogram parameters; (2) morphology; (3) gray-level co-occurrence matrix (GLCM) parameters; (4) gray-level run-length matrix (GLRLM) parameters; and (5) gray-level size zone matrix (GLSZM) parameters.		N/A	N/A	11	Age, histological type, differentiation stage, FIGO stage, albumin, haemoglobin, white blood cells count, neutrophil count, CA-125, CA-199, serum total cholesterol levels	N/A	N/A	Combined model achieved an AUC of 0.868 and accuracy of 76.3% in the training cohort and an AUC of 0.826 and accuracy of 77.1% in the test cohort. The radiomics score was found to be negatively correlated with prognosis in both the training and test cohorts.
Wang et al (23)	SlicerRadomics	1700 (850 x 2)	850 Radiomics features Extracted from: original images and 8 Derived images (obtained by applying Wavelet filters) 18 First-order features 13 Shape features 23 Gray-level Co-occurrence Matrix (GLCM) features 16 Gray-level Run Length Matrix (GLRLM) features 16 Gray-level Size Zone Matrix (GLSZM) features 5 Neighboring Gray Tone Difference Matrix (NGTDM) features 14 Gray-level Dependence Matrix (GL…	10 - PET 1 - CT	N/A	N/A	9	Age, neoadjuvant chemotherapy, residual tumour, volume of ascites, lymph node metastasis, CA-125, FIGO stage, location of primary tumour, diameter of primary tumour	N/A	N/A	PET-RS and CT-RS were significantly associated with PFS both training and validation with respective p-values of <0.00 and 0.01. The clinical+PET-RS model showed higher prognostic performance than other models in training cohort (C-index=0.70, 95% CI 0.68-0.72) and validation cohort (C-index=0.70, 95% CI 0.66-0.74). Calibration curves of each model for prediction of 1-, 3-year PFS indicated Clini…
Vargas et al (40)	3D slicer	Not stated	Gray-level Co-occurrence Matrix (GLCM) Haralick Texture of Similarities: Energy Correlation Contrast Homogeneity Inter-site Similarity Entropy (SE) Similarity Level-Area Matrix Metrics Metrics derived from the similarity level-area matrix were: Inter-site Cluster Variance (SCV) Cluster Shade (SCS) Cluster Prominence (SCP)		N/A	N/A	N/A	N/A	N/A	N/A	Inter-site similarity entropy, similarity level cluster shade, and inter-site similarity level cluster prominence were associated with reduced OS. Similarity level cluster shade, inter-site similarity level cluster prominence and inter-site cluster variance were associated with incomplete surgical resection. 19q12 involving cyclin E1 gene (CCNE1) amplification occurred predominantly in patients w…
Meier et al (41)	MATLAB	Not stated	Haralick Features computed from Gray-level Co-occurrence Matrix (GLCM): Energy Entropy Homogeneity Contrast		ISMs: SE, SCV, and SCP	N/A	N/A	N/A	N/A	N/A	Higher SCV was associated with lower PFS (p = 0.006) and OS (p = 0.003). Higher SCP was associated with lower PFS (p = 0.02) and higher SE was correlated with lower OS (p = 0.01). Higher values of all three metrics were significantly associated with lower CSR status in BRCA-negative patients (SE p = 0.039, SCV p = 0.006, SCP p = 0.02), but not in BRCA positive patients (SE p = 0.7, SCV p = 0.91, …
Veeraraghavan et al (42)	C++ in house based on SITK	Unclear	Cludiss (Cluster Dissimilarity): Haralick Textures Energy Entropy Homogeneity Contrast Average Radiomic Heterogeneity Measures 4 First-order histogram features 5 Gray-level Co-occurrence Matrix (GLCM) features 13 Gray-level Run Length Matrix (GLRLM) features 13 Gray-level Size Zone Matrix (GLSZM) features 5 Neighborhood Gray Tone Difference Matrix (NGTDM) features 15 Neighborhood Gray-level Depen…		N/A	N/A	3	Age, state, resection status	N/A	N/A	The iRCG model demonstrated the best platinum resistance classification accuracy with an AUC of 0.78. CluDiss was found to be associated with PFS (HR 1.03, p = 0.002), negatively correlated with Wnt signalling, positively correlated to immune TME. The value of cluDiss and iRCG demonstrated the ability to better predict HGSOC outcomes than conventional and average radiomic measures.
Himoto et al (43)	A Computational Environment for Radiological Research (CERR) https://github.com/cerr/CERR/		Haralick Texture: Contrast Correlation Energy Entropy Homogeneity Intra-TH Measures: Mean of all per-voxel Haralick texture features within VOI largest-lesion Energylargest-lesion Entropylargest-lesion Contrastlargest-lesion Homogeneitylargest-lesion Correlationlargest-lesion Inter-TH Measures: Cluster-site Entropy Cluster-site Dissimilarity		N/A	N/A	3	Age, histology (clear cell, high grade serous, other), FIGO stage (I-II, III, IV)	N/A	N/A	Univariable analyses of CE-CT derived variables showed that fewer disease sites (p=0.10) and lower inter-TH (p=0.008) and intra-TH (p=0.012) were associated with durable clinical benefit. Multivariable analysis revealed fewer disease sites (P = .003; odds ratio, 1.64) and higher Energylargest-lesion (indicating lower intra-TH; P = .006; odds ratio, 1.41) remained as the only variables associated …
Rizzo et al (46)	IBEX tool (Imaging Biomarker Explorer Software)	1419	Shape Intensity Histogram Intensity Direct Gray-Level Co-occurrence Matrix (2D and 3D) Gray-Level Run Length Matrix (2D) Neighborhood Intensity Difference (2D and 3D)		N/A	Patients with values of the feature F2-Shape/Compactness1 below the median (cluster 8), values of the feature F1-GLCM25/0-1InformationMeasureCorr2 (cluster 10) below the median and patients with values of the feature F1-GLCM25/-333-1InverseVariance (cluster19) above the median, showed a higher risk of RT. Patients with values of the feature F4-GLRLM25/-333RunPercentage (cluster 7) above the media…	9	Age, maximum diameter, CA125 and CA15.3 levels, family history of breast or ovarian cancer, histological FIGO stage, RT, number of affected sites, BRCA status	N/A	N/A	The multivariate clinical-radiomics model demonstrated an AUC of 0.87 p=0.04 compared to the clinical model which demonstrated and AUC of 0.73.
Li et al (53)	PyRadiomics	841		8	5 from T2WI and 3 from CE-T1WI images	GLRLM and GLSZM features extracted from wavelet image, first-order statistical features (minimum and skewness).	N/A	N/A	4	CA-125, LDH, NLR, mass characteristics	The MF-based radiomic signature demonstrated better performance than the MV model with an AUC of 0.744 vs. 0.650, p=0.047. The MF-based combined radiomic-clinical nomogram demonstrated the best overall performance with an AUC of 0.803 and an accuracy of 73.6% in the validation set.
Yi et al (47)	MaZda software	340		N/A	N/A	N/A	34 clinicopathological features and 28 pieces of SNP data	N/A	N/A	N/A	The best performance was achieved by the model combining radiomics, clinicopathological data and SNP data with an AUC of 0.933 in training cohort and 0.967 in validation cohort and therefore suggesting that a CT-based radiomic model with incorporation of SULF1 SNPs allows for accurate prediction of platinum resistance.
Wei et al (48)	Matlab	575	First-Order Statistics (FOS) Shape and Size-based Features Texture Wavelet Features	7	Original FOS Sphericity, original GLSZM Zone percentage, Coif1 FOS uniformity, Coif5 FOS mean, Coif6 FOS median, Coif6 GLSZM Short zone emphasis, Coif8 FOS maximum.	N/A	N/A	N/A	N/A	N/A	The model achieved an AUC of 0.8533 and accuracy of 74.36% in the validation cohort.
Wei et al (49)	Matlab	620	Histogram (17 features) Shape (8 features) Textural (51 features) Wavelet (544 features)	4	CoifletLLL GLSZM ZSV, CoifletLHL FOS maximum, CoifletLHH FOS maximum, CoifletHLL, GLSZM, SZLGE	N/A	7	Age, preoperative CA-125 were used as continuous variables. Categorical variables were dichotomized (FIGO stage III or IV; postoperative CA-125 ≤35 or >35 U/mL; residual tumour=0 cm or >0 cm; tumour side, unilateral or bilateral; menopause status; (menopause or premenopausal)	7	Age, preoperative CA-125, FIGO stage, postoperative CA-125, residual tumor, tumor side, menopause status	The radiomic signature discrimination accuracies for predicting recurrence risk within 18 months were 82.%, 77.3%, and 79.7% for training, internal validation, and external valiation respectively. Radiomic signature discrimination accuracies for predicting recurrence risk within 3 years were 83.4%, 82.0%, and 70.0% for training, internal validation, and external validation respectively. The radio…
Danala et al (50)	Not stated	115	Shape (10 features) Density (21 features) Wavelet (84 features)	3	N/A	N/A	N/A	N/A	N/A	N/A	The highest AUC of 0.838 was achieved using fusion based features.
Danala et al (51)	Not stated	159	Tumor Shape-based Features Tumor Density-based Features Tumor Texture-based Features Wavelet Transform	12	N/A	Pre-treatment feature group Skewness, Contrast-LH, Contrast-HL, Uniformity, Skewness-HH, Sphericity, Entropy, Density std ratio-HL, Kurtosis-HL, Compactness 2, Mean contrast-LH, Kurtosis Pre-post treatment feature group Compactness 1, Volume, Surface area, Fluctuation std-LL, Energy, Median, Entropy-HL, RMS, Density, Maximum density, Density range, Energy-HH	N/A	N/A	N/A	N/A	The best performance was demonstrated by the fusion based markers (both pre-treatment and feature difference features) with AUCs of 0.810 and 0.829 respectively; these were not statistically different.
Zargari et al (52)	Not stated	113	Shape and Density Group (28 features) GLDM Group (60 features) FFT Group (15 features) DCT Group (15 features) Wavelet Group (15 features)	11	SkewnessGLDM4, EnergyGLDM4, CorrelationWAV, EnergyDCT, Energy SkewnessGLDM1, SurfaceArea, SphericalDisproportion, SumDeviation, RangeDCT MeanDCT	N/A	N/A	N/A	N/A	N/A	The final image marker demonstrated an AUC of 0.86.
Li et al (54)	PyRadiomics	1046	Original Image Features (100 features) LoG Features (258 features) Wavelet Features (688 features)	CE-T1WI - 5 T2WI - 10	CE-T1WI based model selected five features, including one LoG feature, one texture feature, and three wavelet features T2WI based model selected 10 features, including one LoG feature, two shape features, and seven wavelet features	wavelet HLH, first-order skewness	2	Status of RT after cytoreduction surgery, CA-125	N/A	N/A	The highest performance was demonstrated by the fusion model with an AUC of 0.86 and accuracy of 78.6%. The radiomics model and clinical models demonstrated AUCs and accuracies of 0.85, 76.9% and 0.72, 70.1% respectively.
Song et al (56)	PyRadiomics	1037	First-Order Statistics Features Shape-based Features Texture Features (GLCM, GLRLM, GLSZM, GLDM, NGTDM) Transform Features (Wavelet)	6	T2 LLH firstorder Skewness, T2 LHH firstorder Minimum, T2 HLL firstorder Skewness, T2 LHH glrlm HighGrayLevelRunEmphasis, DWI HHH GLCM ClusterProminence, DWI HHH gldm DependenceNonUniformityNormalized	N/A	7	Age, Menopausal status, CA-199, CEA, CA-125, CA-153, MR-reported pelvic fluid, MR reported PM	N/A	N/A	Radiologists demonstrated an accuracy of 68.5% and an AUC of 0.628 in the training cohort and an accuracy of 65.7% and an AUC of 0.670 in the validation cohort. The radiomic signature demonstrated and AUC of 0.963 and accuracy of 92.6% in the training cohort and an AUC of 0.928 and accuracy of 80.0% in the validation cohort. The nomogram achieved an AUC of 0.969 and accuracy of 94.4% in the train…
Ai et al (55)	LIFEx	148	First-Order Features (23 features) (derived from histogram, shape, and conventional statistics) Second-Order Features (125 features) (derived from GLCM, NGLDM, GLRLM, and GLZLM)	9	1 GLRLM feature, 6 GLZLM features, 2 NGLDM features	N/A	9	Age, weight, TCHO (≤ 5.2 or > 5.2 mmol/L), TG (≤ 1.7 or > 1.7 mmol/L), HDLC (≤ 2 or > 2 mmol/L), LDLC (≤ 3.12 or > 3.12 mmol/L), blood sugar (≤ 6.1 or > 6.1 mmol/L), CA-125 (≤ 35 or > 35 U/ml), CEA (≤ 5 or > 5 ng/ml).	2	Age, CA-125	The AUC for the radiomics signature, clinical factors model, and combined model were 0.84, 0.70 and 0.88 respectively in the training cohort. The AUC for the radiomics signature, clinical factors model, and combined model were 0.82, 0.83 and 0.86 respectively in the validation cohort.
